# Supplementary material for: Comparative proteomic analysis of different stages of breast cancer tissues using ultra high performance liquid chromatography tandem mass spectrometer
Source: PubMed Central journal article supplement (PMC6964830; doi:10.1371/journal.pone.0227404), 2020-01-16
Supplement: pone.0227404.s001.pdf [file pone.0227404.s001.pdf]

**S1 Table. Fractionation conditions of the GELFREE 10% Mass Cartridge Kit**

| <b>Step</b>                     | <b>1</b> | <b>2</b> | <b>3</b> | <b>4</b> | <b>5</b> | <b>6</b> | <b>7</b> | <b>8</b> | <b>9</b> | <b>10</b> | <b>11</b> | <b>12</b> | <b>13</b> |
|---------------------------------|----------|----------|----------|----------|----------|----------|----------|----------|----------|-----------|-----------|-----------|-----------|
| <b>Voltage (V)</b>              | 50       | 50       | 50       | 50       | 50       | 100      | 100      | 100      | 100      | 100       | 100       | 100       | 100       |
| <b>Fraction interval (min)</b>  | 16       | 36       | 2        | 3        | 4        | 3        | 4        | 5        | 7        | 10        | 15        | 20        | 35        |
| <b>Total elapsed time (min)</b> | 16       | 52       | 54       | 57       | 61       | 64       | 68       | 73       | 80       | 90        | 105       | 125       | 160       |
| <b>Fraction No.</b>             | ---      | 1        | 2        | 3        | 4        | 5        | 6        | 7        | 8        | 9         | 10        | 11        | 12        |
