# Supplementary material for: Comparative proteomic analysis of different stages of breast cancer tissues using ultra high performance liquid chromatography tandem mass spectrometer
Source: PubMed Central journal article supplement (PMC6964830; doi:10.1371/journal.pone.0227404), 2020-01-16
Supplement: pone.0227404.s002.pdf [file pone.0227404.s002.pdf]

**S2 Table. List of proteins identified by LC-MS/MS, in stage 2 of breast cancer tissue and their details as shown in PEAKS Software.**

| Protein name                                                             | Protein ID | Accession                      | -10lgP | Cov. (%) | #Peptides | #Unique | PTM                                   | Avg. Mass | Description                                                                                         |
|--------------------------------------------------------------------------|------------|--------------------------------|--------|----------|-----------|---------|---------------------------------------|-----------|-----------------------------------------------------------------------------------------------------|
| <b>Prolyl 3-hydroxylase 1</b>                                            | 22919      | sp Q32P28 P3H1_HUMAN           | 147.87 | 25       | 10        | 10      | Carbamido methylation                 | 83394     | Prolyl 3-hydroxylase 1 OS=Homo sapiens GN=P3H1 PE=1 SV=2                                            |
| <b>Peptidyl-prolyl cis-trans isomerase FKBP10</b>                        | 22947      | sp Q96AY3 FKBP10_HUMAN         | 149.64 | 30       | 2         | 1       |                                       | 64245     | Peptidyl-prolyl cis-trans isomerase FKBP10 OS=Homo sapiens GN=FKBP10 PE=1 SV=1                      |
| <b>CAP-Gly domain-containing linker protein 1</b>                        | 23712      | sp P30622 CLIP1_HUMAN          | 79.66  | 19       | 9         | 3       | Carbamido methylation ; Oxidation (M) | 162246    | CAP-Gly domain-containing linker protein 1 OS=Homo sapiens GN=CLIP1 PE=1 SV=2                       |
| <b>Peptidyl-prolyl cis-trans isomerase FKBP9</b>                         | 24130      | sp O95302 FKBP9_HUMAN          | 92.02  | 18       | 4         | 4       | Carbamido methylation                 | 63084     | Peptidyl-prolyl cis-trans isomerase FKBP9 OS=Homo sapiens GN=FKBP9 PE=1 SV=2                        |
| <b>Zinc finger CCCH domain-containing protein 18</b>                     | 24279      | sp Q86VM9 ZCH18_HUMAN          | 69.13  | 15       | 3         | 3       | Carbamido methylation                 | 106379    | Zinc finger CCCH domain-containing protein 18 OS=Homo sapiens GN=ZC3H18 PE=1 SV=2                   |
| <b>Immunoglobulin superfamily containing leucine-rich repeat protein</b> | 24971      | sp O14498 ISLR_HUMAN           | 67.06  | 15       | 3         | 3       |                                       | 45997     | Immunoglobulin superfamily containing leucine-rich repeat protein OS=Homo sapiens GN=ISLR PE=2 SV=1 |
| <b>MOB kinase activator 1A</b>                                           | 24983      | sp Q9H8S9 MOB1A_HUMAN          | 78.5   | 16       | 9         | 3       | Carbamido methylation ; Oxidation (M) | 25080     | MOB kinase activator 1A OS=Homo sapiens GN=MOB1A PE=1 SV=4                                          |
| <b>Protein enabled homolog</b>                                           | 22965      | sp Q8N8S7 ENAH_HUMAN           | 94.18  | 20       | 5         | 4       |                                       | 66510     | Protein enabled homolog OS=Homo sapiens GN=ENAH PE=1 SV=2                                           |
| <b>Collagen alpha-1(V) chain</b>                                         | 23027      | tr A0A087WXW9 A0A087WXW9_HUMAN | 133.04 | 18       | 5         | 4       | Carbamido methylation                 | 183652    | Collagen alpha-1(V) chain OS=Homo sapiens GN=COL5A1 PE=1 SV=1                                       |
| <b>Protein canopy homolog 4</b>                                          | 23031      | tr A0A087WXW9 A0A087WXW9_HUMAN | 153.34 | 22       | 4         | 4       | Carbamido methylation                 | 183652    | Collagen alpha-1(V) chain OS=Homo sapiens GN=COL5A1 PE=1 SV=1                                       |
| <b>Perilipin-4 (PLIN4)</b>                                               | 18         | sp Q96Q06 PLIN4_HUMAN          | 192.58 | 32       | 4         | 2       | Carbamido methylation                 | 134431    | Perilipin-4 OS=Homo sapiens GN=PLIN4 PE=1 SV=2                                                      |
| <b>Transmembrane emp24 domain-containing protein 10</b>                  | 3026       | sp P60228 EIF3E_HUMAN          | 114.05 | 24       | 4         | 4       | Carbamido methylation ; Oxidation (M) | 52221     | Eukaryotic translation initiation factor 3 subunit E OS=Homo sapiens GN=EIF3E PE=1 SV=1             |
