# Supplementary material for: Comparative proteomic analysis of different stages of breast cancer tissues using ultra high performance liquid chromatography tandem mass spectrometer
Source: PubMed Central journal article supplement (PMC6964830; doi:10.1371/journal.pone.0227404), 2020-01-16
Supplement: pone.0227404.s003.pdf [file pone.0227404.s003.pdf]

**S3 Table. List of GO and other pathway terms enriched among stage 2 breast cancer samples, with their counts and P-values following DAVID.**

| Term                                                             | Count | P-Value  |
|------------------------------------------------------------------|-------|----------|
| GO:0061077~chaperone-mediated protein folding                    | 3     | 1,31E+12 |
| short sequence motif:Prevents secretion from ER                  | 3     | 4,03E+11 |
| domain:PPIase FKBP-type 4                                        | 2     | 9,97E+10 |
| domain:PPIase FKBP-type 3                                        | 2     | 9,97E+10 |
| domain:PPIase FKBP-type 1                                        | 2     | 0.002    |
| domain:PPIase FKBP-type 2                                        | 2     | 0.002    |
| GO:0006457~protein folding                                       | 3     | 0.003    |
| Metal-binding                                                    | 7     | 0.003    |
| HTF                                                              | 10    | 0.004    |
| GO:0005788~endoplasmic reticulum lumen                           | 3     | 0.005    |
| 847:ovary_normal_3 <sup>rd</sup>                                 | 3     | 0.006    |
| 8560:delta 4-desaturase, sphingolipid 1(DEGS1)                   | 2     | 0.009    |
| GO:0005528~FK506 binding                                         | 2     | 0.009    |
| IPR001179:Peptidyl-prolyl cis-trans isomerase, FKBP-type, domain | 2     | 0.010    |
| Osteogenesis imperfect                                           | 2     | 0.010    |
| IPR023566:Peptidyl-prolyl cis-trans isomerase, FKBP-type         | 2     | 0.011    |
| 13728:uncharacterized tissue_neoplasia_3 <sup>rd</sup>           | 2     | 0.013    |
| 51400:PPME1~protein phosphatase methylesterase 1                 | 2     | 0.017    |
| Rotamase                                                         | 2     | 0.018    |
| 11385:uncharacterized tissue_neoplasia_3 <sup>rd</sup>           | 2     | 0.019    |
| 27173:thyroid_neoplasia_3 <sup>rd</sup>                          | 2     | 0.020    |
| GO:0000413~protein peptidyl-prolyl isomerization                 | 2     | 0.020    |
| GO:0003755~peptidyl-prolyl cis-trans isomerase activity          | 2     | 0.022    |
| 23640:HSPBP1~HSPA (Hsp70) binding protein 1                      | 2     | 0.022    |
| P53                                                              | 10    | 0.025    |
| 17518:thyroid_neoplasia_3 <sup>rd</sup>                          | 2     | 0.026    |
| Teratocarcinoma                                                  | 3     | 0.026    |
| 10956:colon_neoplasia_3 <sup>rd</sup>                            | 2     | 0.027    |
| 21686:brain_neoplasia_3 <sup>rd</sup>                            | 2     | 0.031    |

|                                                     |   |       |
|-----------------------------------------------------|---|-------|
| 4898:NRDC~nardilysin convertase                     | 2 | 0.035 |
| 8882:ZPR1~ZPR1 zinc finger                          | 2 | 0.036 |
| 11187:head and neck_neoplasia_3 <sup>rd</sup>       | 2 | 0.036 |
| 21717:placenta_normal_3 <sup>rd</sup>               | 2 | 0.040 |
| MEIS1                                               | 8 | 0.043 |
| 19240:head and neck_neoplasia_3 <sup>rd</sup>       | 2 | 0.047 |
| 19945:uncharacterized tissue_normal_3 <sup>rd</sup> | 2 | 0.049 |
| GRE                                                 | 8 | 0.049 |
| LMO2COM                                             | 9 | 0.050 |

---

In this table, we show the results from DAVID analysis using proteins for stage 2 samples set. The 'Term' is a name or the ID of a biochemical pathway/gene ontology term/tissue/protein interaction/transcription factor that is enriched in our set. This means that the number of proteins in our list that have been associated to this term (e.g., because they have a PPIase domain or they play a role in chaperone folding) are significantly higher than a background list (in this case, the whole genome). This significance is shown in the P-value column, that is the parameter by which we rank the results, having a P-value threshold of  $P=0.05$ . Finally, we also show the total number of proteins in our list that are represented by each term, in the Count column. This number is not directly correlated to the P-value (that would mean that higher count was related to lower P-values) because the number of proteins for each term is different in the genomic background (i.e., there are more genes in the genome associated to HTF transcription factor than to protein folding. because 10 proteins in our list are associated to HTF for a p-value of 0.004, while only 3 proteins in our list associated to protein folding produce a p-value of  $10^{-12}$
