# Supplementary material for: Comparative proteomic analysis of different stages of breast cancer tissues using ultra high performance liquid chromatography tandem mass spectrometer
Source: PubMed Central journal article supplement (PMC6964830; doi:10.1371/journal.pone.0227404), 2020-01-16
Supplement: pone.0227404.s004.pdf [file pone.0227404.s004.pdf]

**S4 Table. A list of proteins identified by LC-MS/MS, in stage 3 of breast cancer tissue and their details as shown in PEAKS Software.**

| Protein name                                                          | Protein ID | Accession                      | -10lgP | Cov. (%) | #Peptides | #Unique | PTM                                  | Avg. Mass | Description                                                                                 |
|-----------------------------------------------------------------------|------------|--------------------------------|--------|----------|-----------|---------|--------------------------------------|-----------|---------------------------------------------------------------------------------------------|
| <b>Golgi resident protein GCP60</b>                                   | 23480      | sp Q9H3P7 GCP60_HUMAN          | 178.62 | 12       | 5         | 5       | Carbamido methylation                | 60593     | Golgi resident protein GCP60 OS=Homo sapiens GN=ACBD3 PE=1 SV=4                             |
| <b>Eukaryotic peptide chain release factor subunit 1</b>              | 2730       | sp P62495 ERF1_HUMAN           | 110.05 | 13       | 5         | 5       | Carbamido methylation                | 49031     | Eukaryotic peptide chain release factor subunit 1 OS=Homo sapiens GN=ETF1 PE=1 SV=3         |
| <b>Nucleoside diphosphate kinase 3</b>                                | 2753       | sp Q13232 NDK3_HUMAN           | 60     | 16       | 2         | 2       | Carbamido methylation; Oxidation (M) | 19015     | Nucleoside diphosphate kinase 3 OS=Homo sapiens GN=NME3 PE=1 SV=2                           |
| <b>Deoxynucleoside triphosphate triphosphohydrolase SAMHD1</b>        | 3436       | sp Q9Y3Z3 SAMH1_HUMAN          | 111.21 | 21       | 10        | 10      | Carbamido methylation                | 72201     | Deoxynucleoside triphosphate triphosphohydrolase SAMHD1 OS=Homo sapiens GN=SAMHD1 PE=1 SV=2 |
| <b>Protein SEC13 homolog</b>                                          | 3720       | sp P55735 SEC13_HUMAN          | 156.3  | 23       | 5         | 5       | Carbamido methylation                | 35541     | Protein SEC13 homolog OS=Homo sapiens GN=SEC13 PE=1 SV=3                                    |
| <b>Protein SEC13 homolog</b>                                          | 3721       | tr A0A0C4DFR6 A0A0C4DFR6_HUMAN | 43.91  | 16       | 3         | 3       | Carbamido methylation                | 35857     | Protein enabled homolog OS=Homo sapiens GN=ENAH PE=1 SV=2                                   |
| <b>Protein enabled homolog</b>                                        | 22965      | sp Q8N8S7 ENAH_HUMAN           | 94.18  | 10       | 5         | 5       | Carbamido methylation                | 66510     | Rho GTPase-activating protein 1 OS=Homo sapiens GN=ARHGAP1 PE=1 SV=1                        |
| <b>Rho GTPase-activating protein 1</b>                                | 23329      | sp Q07960 RHG01_HUMAN          | 124.29 | 15       | 7         | 7       | Carbamido methylation; Oxidation (M) | 50436     | LEM domain-containing protein 2 OS=Homo sapiens GN=LEMD2 PE=1 SV=1                          |
| <b>LEM domain-containing protein 2</b>                                | 23373      | sp Q8NC56 LEM D2_HUMAN         | 109.47 | 13       | 5         | 5       | Carbamido methylation                | 56975     | TAR DNA-binding protein 43 (Fragment) OS=Homo sapiens GN=TARDBP PE=1 SV=1                   |
| <b>TAR DNA-binding protein 43 (Fragment)</b>                          | 23455      | tr A0A087WX29 A0A087WX29_HUMAN | 82.04  | 18       | 4         | 4       | Carbamido methylation                | 26743     | V-type proton ATPase subunit E 1 OS=Homo sapiens GN=ATP6V1E1 PE=1 SV=1                      |
| <b>V-type proton ATPase subunit E 1</b>                               | 23744      | sp P36543 VATE1_HUMAN          | 49.52  | 14       | 3         | 3       | Carbamido methylation; Oxidation (M) | 26145     | Prefoldin subunit 1 OS=Homo sapiens GN=PFDN1 PE=1 SV=1                                      |
| <b>Prefoldin subunit 1</b>                                            | 23751      | sp O60925 PFD1_HUMAN           | 64.03  | 24       | 3         | 3       | Carbamido methylation; Oxidation (M) | 14210     | Coiled-coil domain-containing protein 58 (Fragment) OS=Homo sapiens GN=CCDC58 PE=1 SV=1     |
| <b>Coiled-coil domain-containing protein 58 (Fragment)</b>            | 23932      | tr H7C525 H7C525_HUMAN         | 87.57  | 37       | 4         | 4       | Carbamido methylation                | 16385     | DNA-dependent protein kinase catalytic subunit OS=Homo sapiens GN=PRKDC PE=1 SV=3           |
| <b>Inhibitor of nuclear factor kappa-B kinase-interacting protein</b> | 24189      | sp Q70UQ0 IKIP_HUMAN           | 83.72  | 12       | 4         | 4       | Carbamido methylation; Oxidation (M) | 39309     | Transmembrane glycoprotein NMB OS=Homo sapiens GN=GPNMB PE=1 SV=2                           |
| <b>DNA-dependent protein kinase</b>                                   | 24231      | sp P78527 PRKDC_HUMAN          | 114.44 | 12       | 12        | 12      | Carbamido methylation                | 469093    | MOB kinase activator 1A OS=Homo sapiens                                                     |

| catalytic subunit                     |       |                        |       |    |   |   |                        | GN=MOB1A PE=1 SV=4                                                                           |
|---------------------------------------|-------|------------------------|-------|----|---|---|------------------------|----------------------------------------------------------------------------------------------|
| <b>Transmembrane glycoprotein NMB</b> | 24286 | sp Q14956 GPN MB_HUMAN | 56.1  | 14 | 3 | 3 | Carbamido methylation  | 63923<br>MOB kinase activator 1B OS=Homo sapiens GN=MOB1B PE=1 SV=3                          |
| <b>MOB kinase activator 1A</b>        | 24983 | sp Q9H8S9 MOB 1A_HUMAN | 73.49 | 18 | 8 | 3 | Carbamido methylation  | 25080<br>Golgi resident protein GCP60 OS=Homo sapiens GN=ACBD3 PE=1 SV=4                     |
| <b>MOB kinase activator 1B</b>        | 24984 | sp Q7L9L4 MOB 1B_HUMAN | 73.49 | 19 | 2 | 2 | Carbamido methylation; | 25091<br>Eukaryotic peptide chain release factor subunit 1 OS=Homo sapiens GN=ETF1 PE=1 SV=3 |
