# Supplementary material for: Comparative proteomic analysis of different stages of breast cancer tissues using ultra high performance liquid chromatography tandem mass spectrometer
Source: PubMed Central journal article supplement (PMC6964830; doi:10.1371/journal.pone.0227404), 2020-01-16
Supplement: pone.0227404.s005.pdf [file pone.0227404.s005.pdf]

**S5 Table. List of GO and other pathway terms enriched in the set among stage 3 breast cancer samples, with their counts and P-values following DAVID.**

| <b>Term</b>                                                                 | <b>Count</b> | <b>P-Value</b> |
|-----------------------------------------------------------------------------|--------------|----------------|
| Acetylation                                                                 | 11           | 2,14E+10       |
| Platelet                                                                    | 6            | 4,21E+10       |
| 9701:PPP6R2~protein phosphatase 6 regulatory subunit 2                      | 3            | 1,67E+11       |
| 22870:PPP6R1~protein phosphatase 6 regulatory subunit 1                     | 3            | 3,00E+11       |
| 5537:protein phosphatase 6 catalytic subunit(PPP6C)                         | 3            | 3,41E+11       |
| 5537:PPP6C~protein phosphatase 6 catalytic subunit                          | 3            | 4,98E+11       |
| 55291:PPP6R3~protein phosphatase 6 regulatory subunit 3                     | 3            | 6,78E+11       |
| FOXO4                                                                       | 14           | 0.001          |
| 39351:eye_uncharacterized histology_3rd                                     | 4            | 0.001          |
| Phosphoprotein                                                              | 13           | 0.002          |
| 6449:cervix_neoplasia_3rd                                                   | 4            | 0.005          |
| 21381:lung_neoplasia_3rd                                                    | 3            | 0.006          |
| 81532:MOB kinase activator 2(MOB2)                                          | 2            | 0.006          |
| IPR005301:Mob1/phocein                                                      | 2            | 0.006          |
| 9770:RASSF2~Ras association domain family member 2                          | 2            | 0.006          |
| 5515:PPP2CA~protein phosphatase 2 catalytic subunit alpha                   | 3            | 0.007          |
| 23143:leucine rich repeats and calponin homology domain containing 1(LRCH1) | 2            | 0.007          |
| 1q42.12                                                                     | 2            | 0.008          |
| 51379:CRLF3~cytokine receptor like factor 3                                 | 2            | 0.008          |
| 81532:MOB2~MOB kinase activator 2                                           | 2            | 0.008          |
| SM01388:SM01388                                                             | 2            | 0.009          |
| 23143:LRCH1~leucine rich repeats and calponin homology domain containing 1  | 2            | 0.009          |
| GO:0005515~protein binding                                                  | 13           | 0.010          |
| 23012:serine/threonine kinase 38 like(STK38L)                               | 2            | 0.011          |
| 26524:large tumor suppressor kinase 2(LATS2)                                | 2            | 0.012          |
| 22872:SEC31 homolog A, COPII coat complex component(SEC31A)                 | 2            | 0.012          |
| 57631:leucine rich repeats and calponin homology domain containing 2(LRCH2) | 2            | 0.012          |
| 84859:LRCH3~leucine rich repeats and calponin homology domain containing 3  | 2            | 0.012          |
| 57631:LRCH2~leucine rich repeats and calponin homology domain containing 2  | 2            | 0.012          |
| 283373:ankyrin repeat domain 52(ANKRD52)                                    | 2            | 0.013          |
| 23012:STK38L~serine/threonine kinase 38 like                                | 2            | 0.013          |
| 6789:serine/threonine kinase 4(STK4)                                        | 3            | 0.014          |
| 695:testi_neoplasia_3rd                                                     | 3            | 0.014          |
| 51194:importin 11(IPO11)                                                    | 2            | 0.014          |
| 5784:PTPN14~protein tyrosine phosphatase, non-receptor type 14              | 2            | 0.014          |
| 57572:DOCK6~dedicator of cytokinesis 6                                      | 2            | 0.016          |
| 57572:dedicator of cytokinesis 6(DOCK6)                                     | 2            | 0.016          |
| 283373:ANKRD52~ankyrin repeat domain 52                                     | 2            | 0.017          |
| 51379:cytokine receptor like factor 3(CRLF3)                                | 2            | 0.017          |
| 11133:head and neck_neoplasia_3rd                                           | 2            | 0.017          |
| 60485:SAV1~salvador family WW domain containing protein 1                   | 2            | 0.018          |

|                                                                             |    |       |
|-----------------------------------------------------------------------------|----|-------|
| R-HSA-2028269:R-HSA-2028269                                                 | 2  | 0.020 |
| 55291:protein phosphatase 6 regulatory subunit 3(PPP6R3)                    | 2  | 0.020 |
| 988:cell division cycle 5 like(CDC5L)                                       | 4  | 0.020 |
| 81704:DOCK8~dedicator of cytokinesis 8                                      | 2  | 0.021 |
| 7247:TSN~translin                                                           | 2  | 0.022 |
| GO:0035329~hippo signaling                                                  | 2  | 0.022 |
| 22938:SNW domain containing 1(SNW1)                                         | 4  | 0.023 |
| 84859:leucine rich repeats and calponin homology domain containing 3(LRCH3) | 2  | 0.025 |
| 81704:dedicator of cytokinesis 8(DOCK8)                                     | 2  | 0.025 |
| 83593:RASSF5~Ras association domain family member 5                         | 2  | 0.027 |
| 11124:head and neck_neoplasia_3rd                                           | 2  | 0.027 |
| 9701:protein phosphatase 6 regulatory subunit 2(PPP6R2)                     | 2  | 0.027 |
| 351:APP~amyloid beta precursor protein                                      | 6  | 0.028 |
| 9770:Ras association domain family member 2(RASSF2)                         | 2  | 0.028 |
| 20295:head and neck_neoplasia_3rd                                           | 2  | 0.032 |
| 6789:STK4~serine/threonine kinase 4                                         | 2  | 0.032 |
| 22872:SEC31A~SEC31 homolog A, COPII coat complex component                  | 2  | 0.032 |
| 6232:mammary gland_neoplasia_3rd                                            | 2  | 0.032 |
| 26524:LATS2~large tumor suppressor kinase 2                                 | 2  | 0.033 |
| 38094:lung_uncharacterized histology_3 <sup>rd</sup>                        | 3  | 0.033 |
| 23243:ANKRD28~ankyrin repeat domain 28                                      | 2  | 0.034 |
| 51194:IPO11~importin 11                                                     | 2  | 0.034 |
| 11329:STK38~serine/threonine kinase 38                                      | 2  | 0.035 |
| 17656:head and neck_neoplasia_3rd                                           | 2  | 0.035 |
| 85440:dedicator of cytokinesis 7(DOCK7)                                     | 2  | 0.036 |
| 29963:liver_neoplasia_3rd                                                   | 3  | 0.036 |
| 6788:STK3~serine/threonine kinase 3                                         | 2  | 0.037 |
| SRY                                                                         | 10 | 0.037 |
| 9113:LATS1~large tumor suppressor kinase 1                                  | 2  | 0.037 |
| 667:dystonin(DST)                                                           | 2  | 0.038 |
| 11200:CHEK2~checkpoint kinase 2                                             | 2  | 0.038 |
| 83593:Ras association domain family member 5(RASSF5)                        | 2  | 0.039 |
| Cervix carcinoma                                                            | 3  | 0.039 |
| 8894:EIF2S2~eukaryotic translation initiation factor 2 subunit beta         | 2  | 0.039 |
| 25929:gem nuclear organelle associated protein 5(GEMIN5)                    | 2  | 0.040 |
| EVII                                                                        | 15 | 0.040 |
| GO:0005829~cytosol                                                          | 7  | 0.040 |
| 5784:protein tyrosine phosphatase, non-receptor type 14(PTPN14)             | 2  | 0.041 |
| TBP                                                                         | 9  | 0.041 |
| 40211:uncharacterized tissue_uncharacterized histology_3rd                  | 3  | 0.041 |
| 16556:uncharacterized tissue_uncharacterized histology_3rd                  | 3  | 0.042 |
| 22870:protein phosphatase 6 regulatory subunit 1(PPP6R1)                    | 2  | 0.043 |
| SH3-binding                                                                 | 2  | 0.045 |
| 8663:EIF3C~eukaryotic translation initiation factor 3 subunit C             | 2  | 0.045 |
| 667:DST~dystonin                                                            | 2  | 0.047 |
| GO:0001933~negative regulation of protein phosphorylation                   | 2  | 0.050 |

The 'Term' is a name or the ID of a biochemical pathway/gene ontology term/tissue/protein interaction/transcription factor that is enriched in our set. This means that the number of proteins in

our list that have been associated to this term (e.g., because they are expressed in platelets, they play a role in protein acetylation, or they interact with PPP6R2 or they are regulated by FOXO4 transcription factor) are significantly higher than a background list (in this case, the whole genome). This significance is shown in the P-value column, that is the parameter by which we rank the results, having a P-value threshold of  $P=0.05$ . Finally, we also show the total number of proteins in our list that are represented by each term, in the Count column. This number is not directly correlated to the P-value (that would mean that higher count was related to lower P-values) because the number of proteins for each term is different in the genomic background (i.e., there are more genes in the genome associated to FOXO4 transcription factor than to platelets. because 14 proteins in our list are associated to FOXO4 for a p-value of 0.001, while only 6 proteins in our list associated to platelets produce a p-value of  $10^{-10}$
