# Supplementary material for: Comparative proteomic analysis of different stages of breast cancer tissues using ultra high performance liquid chromatography tandem mass spectrometer
Source: PubMed Central journal article supplement (PMC6964830; doi:10.1371/journal.pone.0227404), 2020-01-16
Supplement: pone.0227404.s009.pdf [file pone.0227404.s009.pdf]

**S5 Appendix.** PEAKS provides a number of statistical charts: peptide score distribution, peptide number Venn diagram, protein score distribution, and the protein number Venn diagram.

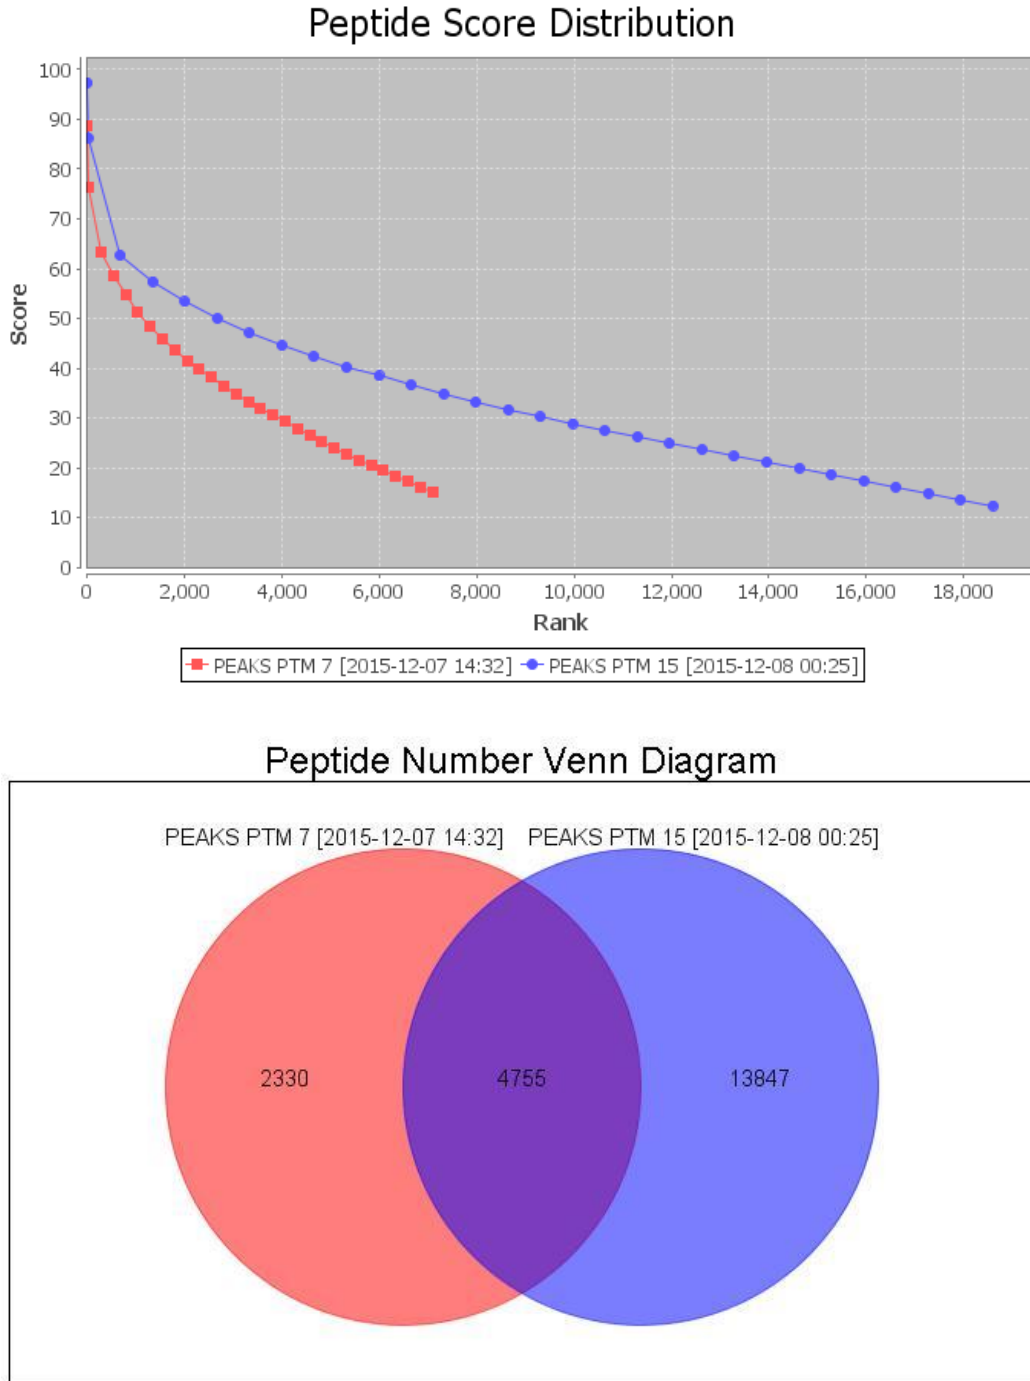

**Fig A.** Venn diagram of peptide score distribution and numbers of tumor and adjacent normal tissues for stage 2. (Blue colour is tumor and red colour is normal)

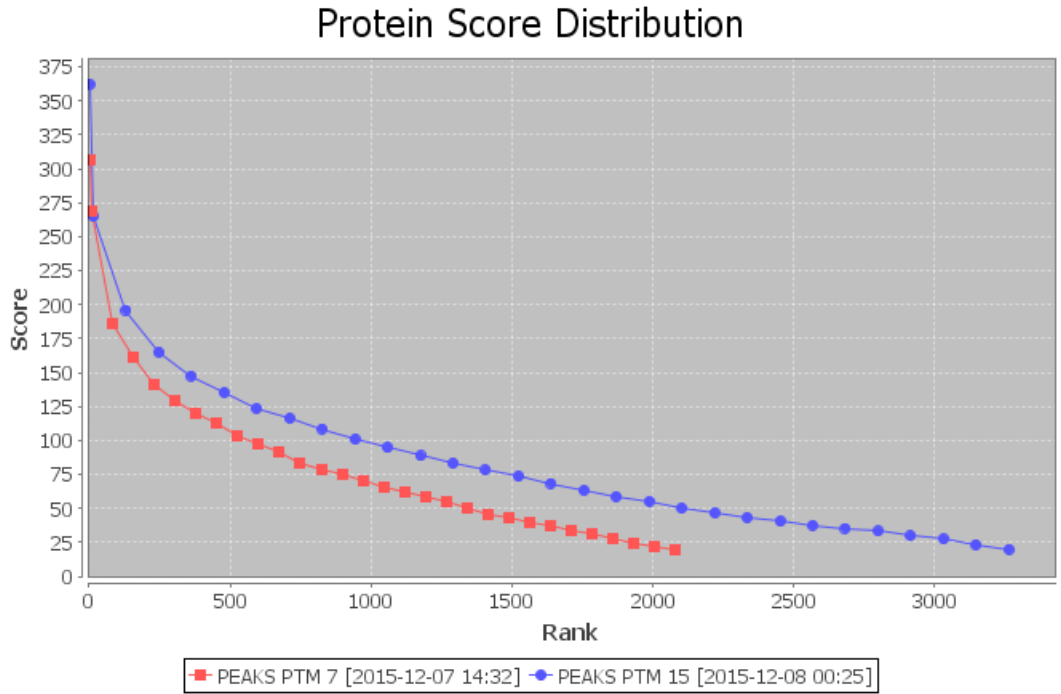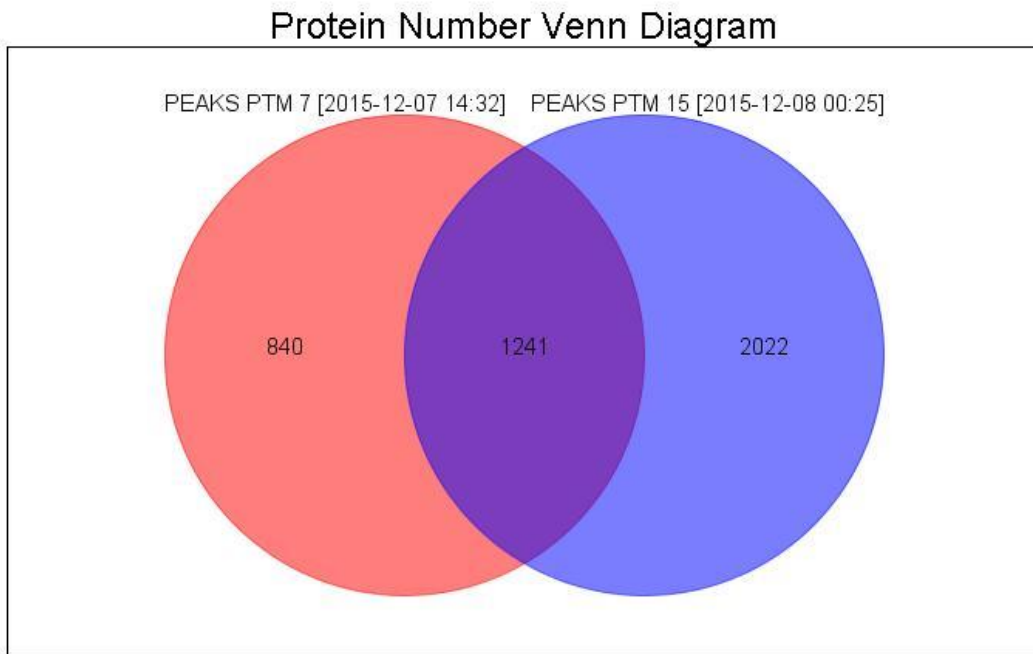

**Fig B.** Venn diagram of protein score distribution and protein numbers in tumor and adjacent normal tissues for stage 2.

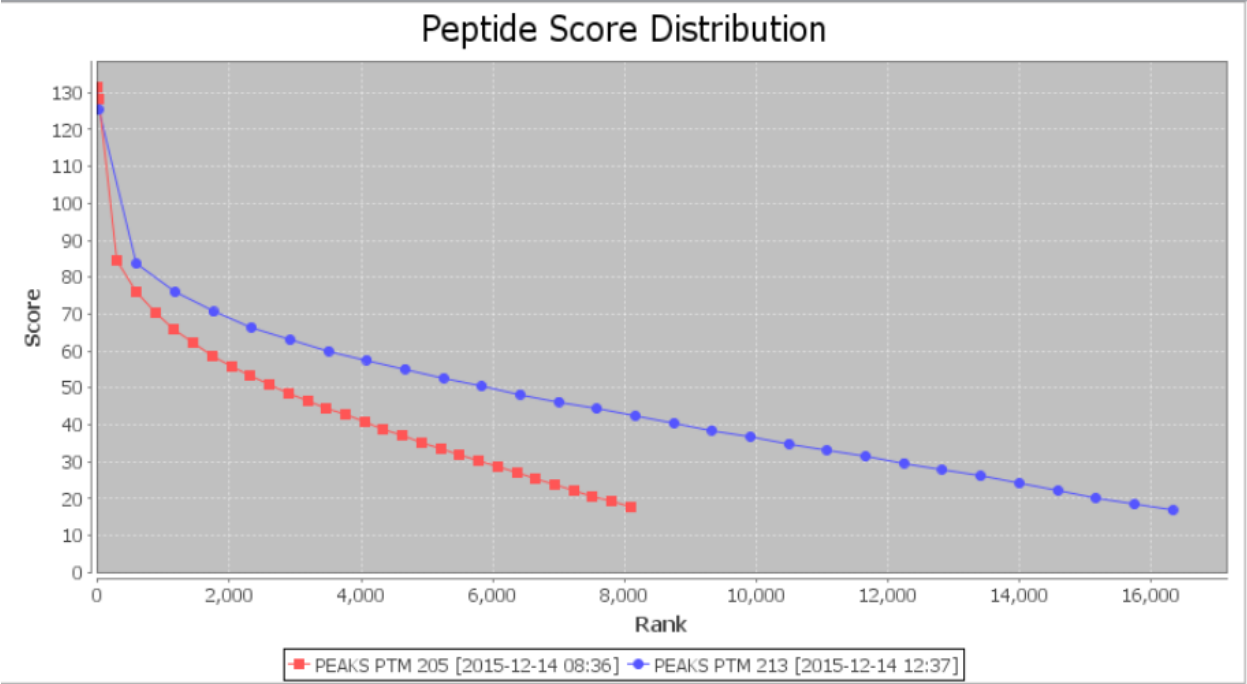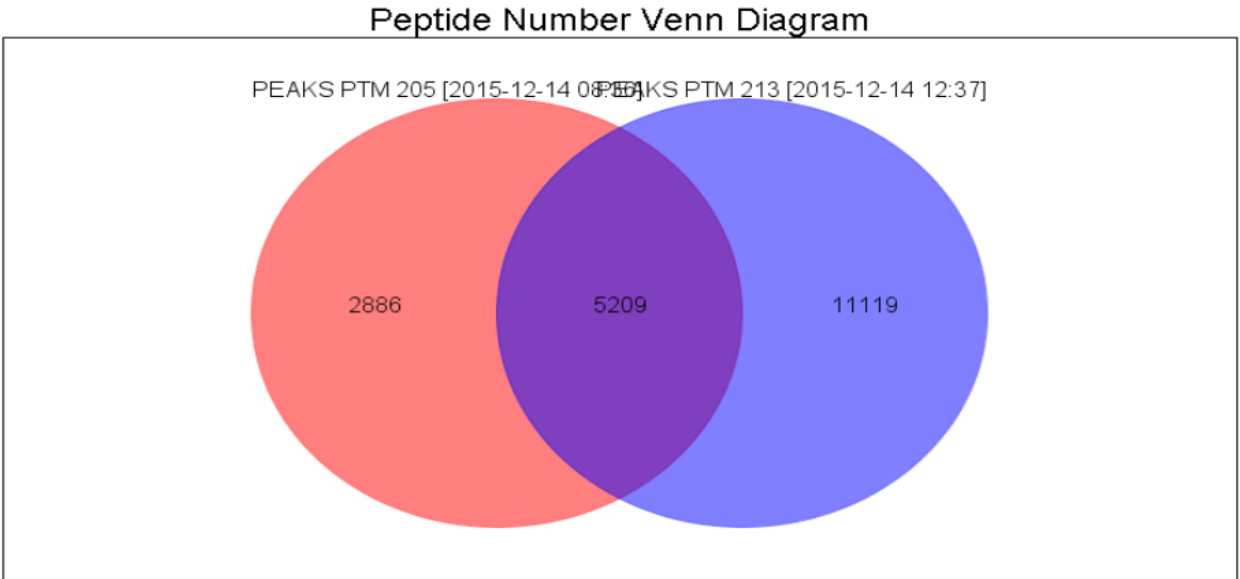

**Fig C.** Venn diagram of peptide score distribution and protein numbers in tumor and adjacent normal tissues for stage 3

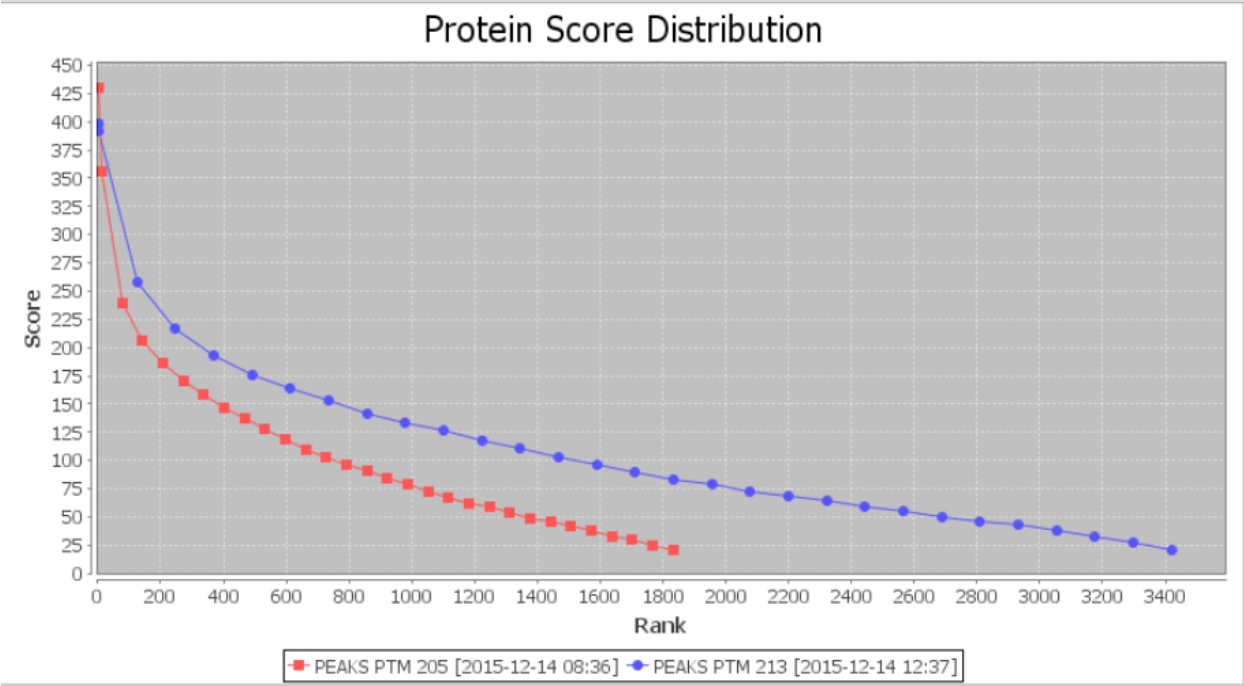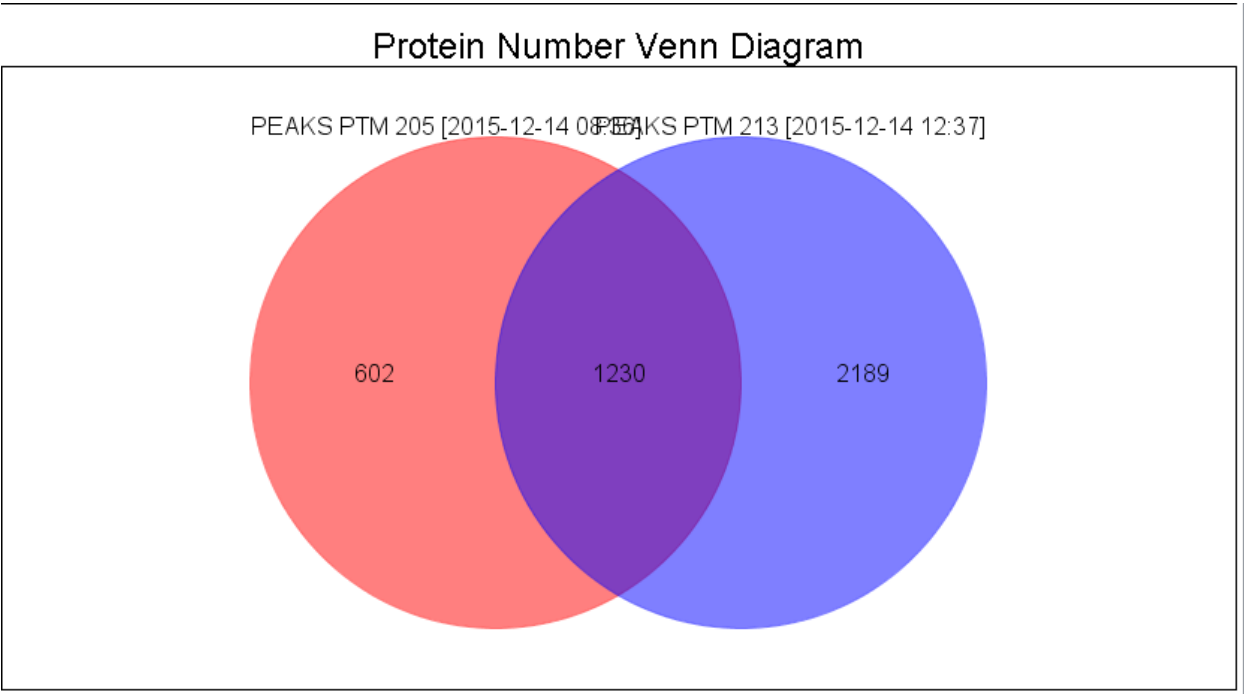

**Fig D.** Venn diagram of protein score distribution and protein numbers in tumor and adjacent normal tissues for stage 3
